# Supplementary material for: Urban brown rats (Rattus norvegicus) as possible source of multidrug-resistant Enterobacteriaceae and meticillin-resistant Staphylococcus spp., Vienna, Austria, 2016 and 2017
Source: PubMed Central journal article supplement (PMC6693289; doi:10.2807/1560-7917.es.2019.24.32.1900149), 2019-08-08
Supplement: 1900149_DESVARS-LARRIVE_Supplement.pdf [file 1900149_DESVARS-LARRIVE_Supplement.pdf]

# **Urban Brown Rats (*Rattus norvegicus*) as Possible Source of Multidrug-Resistant *Enterobacteriaceae* and Methicillin-Resistant *Staphylococcus* spp., Vienna, Austria, 2016/17**

## **Supplementary Materials**

This supplementary material is hosted by *Eurosurveillance* as supporting information alongside the article "Urban Brown Rats (*Rattus norvegicus*) as Possible Source of Multidrug-Resistant *Enterobacteriaceae* and Methicillin-Resistant *Staphylococcus* spp., Vienna, Austria, 2016/17" on behalf of the authors who remain responsible for the accuracy and appropriateness of the content. The same standards for ethics, copyright, attributions and permissions as for the article apply. *Eurosurveillance* is not responsible for the maintenance of any links or email addresses provided therein.

**Supplementary Figure S1. Spatial distribution of the captured brown rats (*Rattus norvegicus*) and antimicrobial resistant isolates in Karlsplatz (S1A) and Danube Canal (S1B), September 13, 2016 - June 6, 2017, Vienna, Austria**

Maps were built using QGIS 3.4.5 (QGIS Development Team, 2018). Basemaps: Orthofoto 2016 Wien (Open Data Österreich, <https://www.data.gv.at/>)

**Figure S1A. Karlsplatz, Vienna, Austria**

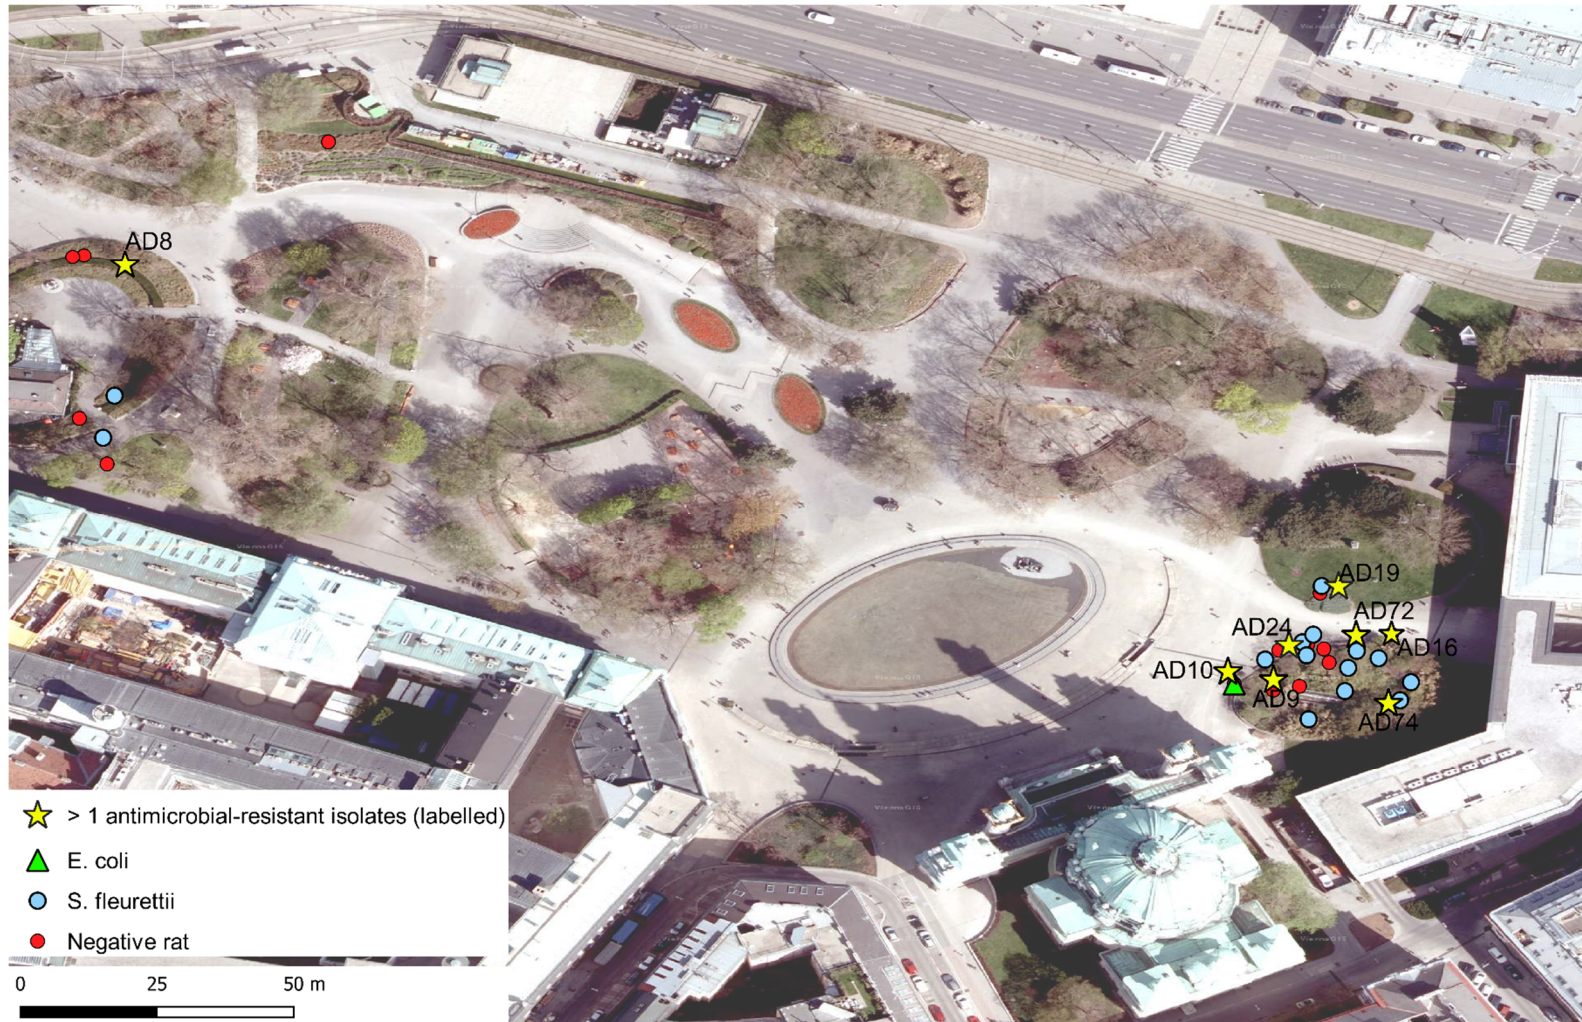

**Figure S1B. Danube Canal, Vienna, Austria**

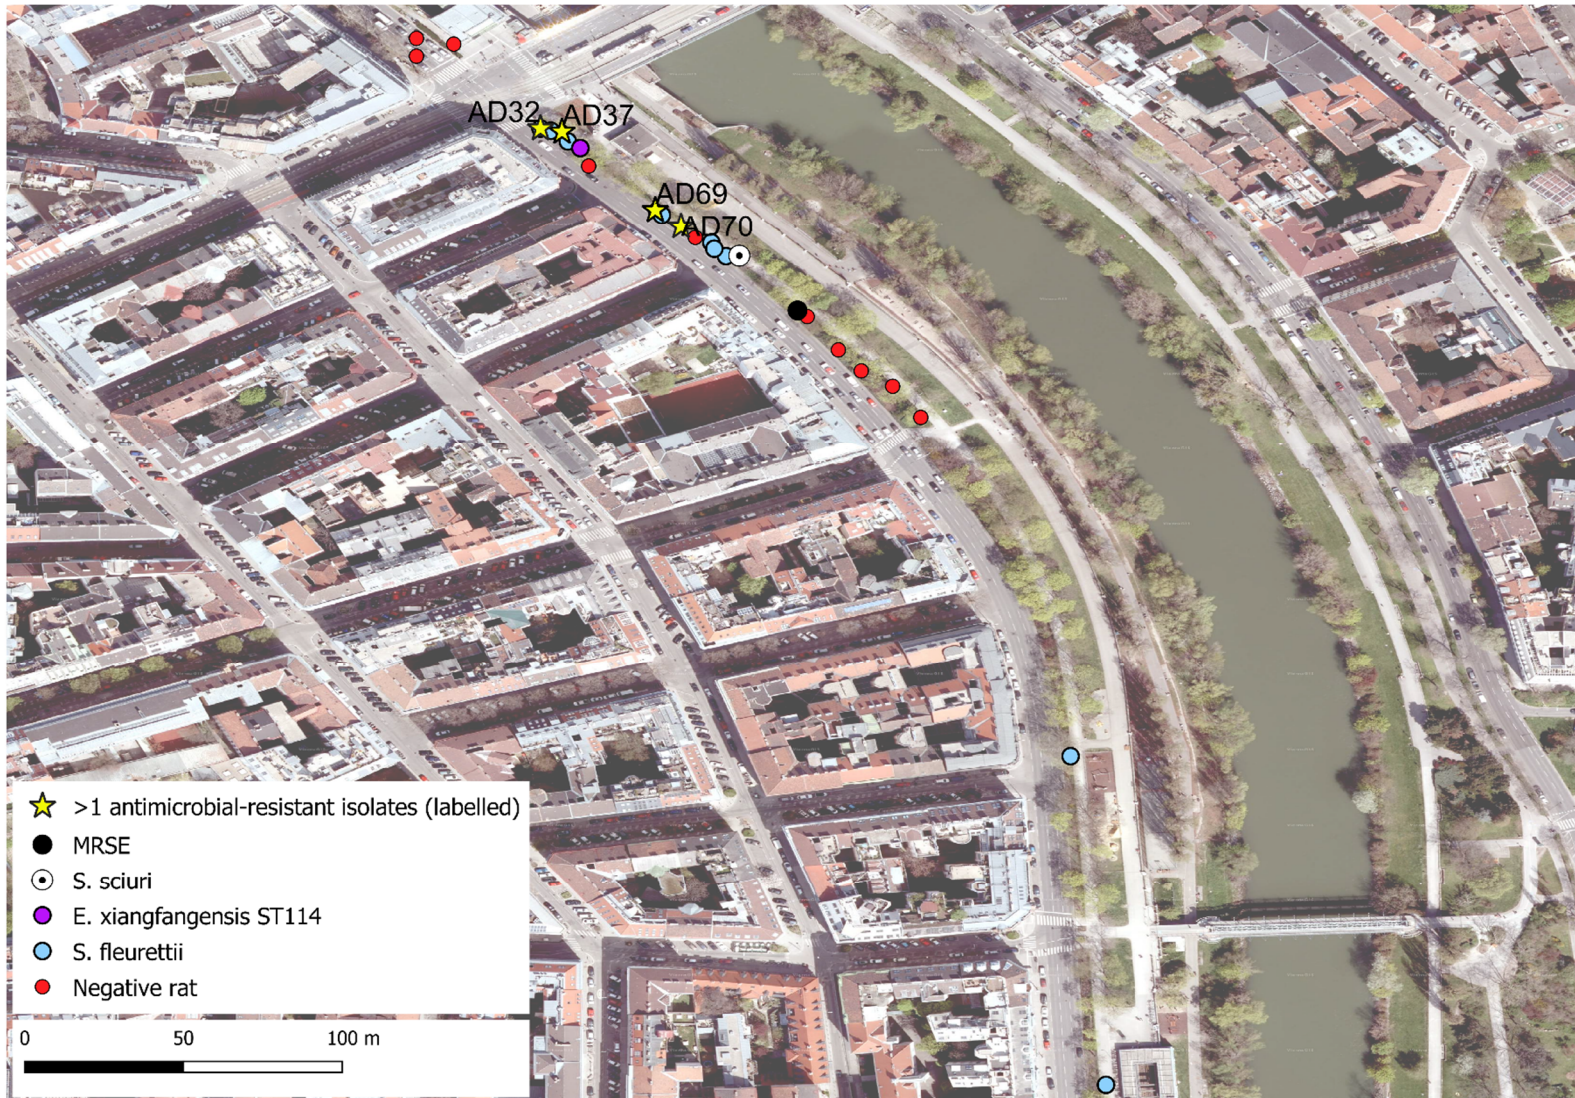

**Supplementary Table S1. Summary characteristics of the brown rats (*Rattus norvegicus*) captured, September 13, 2016 - June 6, 2017, Vienna, Austria**

| Rat ID | Place      | Date of capture | Latitude (D.D.) | Longitude (D.D.) | Elevation (m) | Sex    | Body mass (g) | Length nose-anus (mm) | Length anus-tip tail (mm) | <i>Enterobacteriaceae</i> isolates (no.) | <i>Staphylococcus</i> spp. isolates (no.) |
|--------|------------|-----------------|-----------------|------------------|---------------|--------|---------------|-----------------------|---------------------------|------------------------------------------|-------------------------------------------|
| AD1    | Karlsplatz | 2016 Sep 13     | 48.19928        | 16.36938         | 135.7         | male   | 264.9         | 229                   | 174                       |                                          |                                           |
| AD2    | Karlsplatz | 2016 Sep 13     | 48.20008        | 16.36992         | 188.5         | male   | 185.3         | 191                   | 163                       |                                          |                                           |
| AD3    | Karlsplatz | 2016 Sep 13     | 48.1998         | 16.36932         | 174.4         | female | 65.7          | 138                   | 128                       |                                          |                                           |
| AD4    | Karlsplatz | 2016 Sep 13     | 48.19979        | 16.36929         | 173.9         | female | 65.3          | 143                   | 125                       |                                          |                                           |
| AD5    | Karlsplatz | 2016 Sep 20     | 48.19939        | 16.36931         | 166.4         | male   | 269.7         | 232                   | 194                       |                                          |                                           |
| AD6    | Karlsplatz | 2016 Sep 20     | 48.19945        | 16.36939         | 166.7         | male   | 276.5         | 223                   | 186                       |                                          | <i>S. fleurettii</i>                      |
| AD7    | Karlsplatz | 2016 Sep 20     | 48.19935        | 16.36937         | 166.4         | male   | 353.2         | 239                   | 210                       |                                          | <i>S. fleurettii</i>                      |
| AD8    | Karlsplatz | 2016 Sep 20     | 48.19971        | 16.36931         | 168.8         | female | 334.3         | 238                   | 221                       | <i>E. coli</i>                           | <i>S. fleurettii</i>                      |
| AD9    | Karlsplatz | 2016 Sep 27     | 48.1988         | 16.37246         | 181.3         | female | 209.8         | 214                   | 183                       |                                          | <i>S. fleurettii</i> , MRSP               |
| AD10   | Karlsplatz | 2016 Sep 27     | 48.19879        | 16.3723          | 180.4         | female | 352.1         | 239                   | 250                       | <i>E. coli</i> (2)                       | <i>S. fleurettii</i> , <i>S. xylosus</i>  |
| AD11   | Karlsplatz | 2016 Sep 27     | 48.19878        | 16.37243         | 179.9         | female | 76.6          | 143                   | 130                       |                                          | <i>S. fleurettii</i>                      |
| AD12   | Karlsplatz | 2016 Sep 27     | 48.19879        | 16.37238         | 179.2         | female | 204.3         | 208                   | 172                       |                                          |                                           |
| AD13   | Karlsplatz | 2016 Sep 27     | 48.19884        | 16.37232         | 179.7         | female | 102.5         | 155                   | 148                       |                                          | <i>S. fleurettii</i>                      |
| AD14   | Karlsplatz | 2016 Oct 11     | 48.19891        | 16.37234         | 132.5         | female | 42.1          | 119                   | 111                       |                                          |                                           |
| AD15   | Karlsplatz | 2016 Oct 11     | 48.19893        | 16.37233         | 131.8         | female | 38.3          | 107                   | 91                        |                                          | <i>S. fleurettii</i>                      |
| AD16   | Karlsplatz | 2016 Oct 11     | 48.19894        | 16.37259         | 115.7         | male   | 118.8         | 180.1                 | 160                       |                                          | <i>S. fleurettii</i> (2)                  |
| AD17   | Karlsplatz | 2016 Oct 11     | 48.19886        | 16.3724          | 126.3         | male   | 274.1         | 221                   | 205                       |                                          | <i>S. fleurettii</i>                      |
| AD18   | Karlsplatz | 2016 Oct 11     | 48.19883        | 16.37233         | 128.0         | female | 238.9         | 206                   | 186                       |                                          |                                           |
| AD19   | Karlsplatz | 2016 Oct 11     | 48.19893        | 16.37237         | 133.7         | male   | 46.6          | 121                   | 111                       | <i>E. coli</i>                           | <i>S. sciuri</i>                          |
| AD20   | Karlsplatz | 2016 Oct 11     | 48.19875        | 16.37247         | 129.4         | female | 47.0          | 155                   | 102                       |                                          |                                           |
| AD21   | Karlsplatz | 2016 Oct 11     | 48.19877        | 16.37228         | 122.0         | male   | 375.8         | 251                   | 213                       | <i>E. coli</i>                           |                                           |
| AD22   | Karlsplatz | 2016 Oct 11     | 48.19882        | 16.37226         | 121.0         | male   | 242.2         | 288                   | 187                       |                                          |                                           |
| AD23   | Karlsplatz | 2016 Oct 11     | 48.19882        | 16.37245         | 123.9         | male   | 351.0         | 242                   | 204                       |                                          | <i>S. fleurettii</i>                      |
| AD24   | Karlsplatz | 2016 Oct 11     | 48.19877        | 16.37237         | 116.0         | male   | 424.7         | 262                   | 218                       | <i>E. coli</i>                           | <i>S. fleurettii</i>                      |

|      |              |             |          |          |       |        |       |     |     |                                        |
|------|--------------|-------------|----------|----------|-------|--------|-------|-----|-----|----------------------------------------|
| AD25 | Karlsplatz   | 2016 Oct 11 | 48.19879 | 16.37235 | 114.3 | female | 305.0 | 216 | 196 | <i>S. fleurettii</i>                   |
| AD26 | Karlsplatz   | 2016 Oct 18 | 48.19874 | 16.37227 | 114.0 | female | 33.9  | 111 | 99  |                                        |
| AD27 | Karlsplatz   | 2016 Oct 18 | 48.19879 | 16.37241 | 111.9 | male   | 40.9  | 102 | 95  | <i>S. fleurettii</i>                   |
| AD28 | Karlsplatz   | 2016 Oct 18 | 48.19881 | 16.37233 | 112.6 | female | 28.5  | 99  | 91  | <i>S. fleurettii</i>                   |
| AD29 | Karlsplatz   | 2016 Oct 18 | 48.19873 | 16.37231 | 89.0  | female | 30.1  | 100 | 100 |                                        |
| AD30 | Karlsplatz   | 2016 Oct 18 | 48.19885 | 16.3723  | 77.8  | male   | 32.1  | 105 | 102 | <i>S. fleurettii</i>                   |
| AD31 | Danube Canal | 2017 Mar 6  | 48.22627 | 16.36576 | 168.6 | male   | 381.5 | 249 | 194 | <i>S. fleurettii</i>                   |
| AD32 | Danube Canal | 2017 Mar 6  | 48.22681 | 16.36497 | 177.2 | female | 408.9 | 240 | 195 | <i>E. coli</i><br><i>S. fleurettii</i> |
| AD33 | Danube Canal | 2017 Mar 6  | 48.22681 | 16.36497 | 177.2 | male   | 277.9 | 224 | 178 | <i>S. fleurettii</i>                   |
| AD34 | Danube Canal | 2017 Mar 7  | 48.22673 | 16.36497 | 168.4 | female | 153.5 | 188 | 165 | <i>S. fleurettii</i>                   |
| AD35 | Danube Canal | 2017 Mar 7  | 48.22629 | 16.36569 | 166.9 | male   | 100.5 | 152 | 125 | <i>S. fleurettii</i>                   |
| AD36 | Danube Canal | 2017 Mar 7  | 48.22673 | 16.36497 | 167.4 | male   | 162.4 | 188 | 163 | <i>S. fleurettii</i>                   |
| AD37 | Danube Canal | 2017 Mar 7  | 48.2268  | 16.36506 | 177.2 | female | 209.7 | 194 | 172 | <i>S. fleurettii</i> (2)               |
| AD38 | Danube Canal | 2017 Mar 7  | 48.22265 | 16.36738 | 167.6 | male   | 211.8 | 214 | 184 | <i>S. fleurettii</i>                   |
| AD39 | Danube Canal | 2017 Mar 7  | 48.22414 | 16.36715 | 169.1 | female | 211.4 | 190 | 190 | <i>S. fleurettii</i>                   |
| AD50 | Danube Canal | 2017 Mar 21 | 48.22627 | 16.36582 | 153.0 | female | 152.9 | 180 | 155 | <i>S. sciuri</i>                       |
| AD51 | Danube Canal | 2017 Mar 28 | 48.22632 | 16.36561 | 162.8 | male   | 44.8  | 113 | 100 |                                        |
| AD52 | Danube Canal | 2017 Mar 28 | 48.2263  | 16.36571 | 163.3 | male   | 45.8  | 122 | 115 | <i>S. fleurettii</i>                   |
| AD53 | Danube Canal | 2017 Mar 28 | 48.22661 | 16.36519 | 159.0 | female | 319.4 | 206 | 226 |                                        |
| AD54 | Danube Canal | 2017 Mar 28 | 48.22669 | 16.36506 | 158.5 | male   | 392.3 | 237 | 157 | <i>E. xiangfangensis</i>               |
| AD59 | Karlsplatz   | 2017 Apr 11 | 48.19875 | 16.37244 | 159.2 | female | 134.2 | 169 | 149 | <i>S. fleurettii</i>                   |
| AD60 | Danube Canal | 2017 Apr 12 | 48.22587 | 16.36624 | 174.6 | female | 73.1  | 132 | 129 |                                        |
| AD61 | Danube Canal | 2017 Apr 12 | 48.22644 | 16.36549 | 184.2 | female | 49.0  | 123 | 113 | <i>S. fleurettii</i>                   |
| AD62 | Danube Canal | 2017 Apr 12 | 48.22575 | 16.36629 | 174.3 | male   | 80.0  | 142 | 137 |                                        |
| AD63 | Danube Canal | 2017 Apr 12 | 48.22572 | 16.36647 | 175.1 | female | 70.7  | 138 | 128 |                                        |
| AD64 | Danube Canal | 2017 Apr 12 | 48.22601 | 16.36661 | 175.4 | female | 303.2 | 219 | 172 |                                        |
| AD65 | Danube Canal | 2017 May 2  | 48.22717 | 16.36451 | 186.0 | male   | 64.1  | 138 | 131 |                                        |
| AD66 | Danube Canal | 2017 May 2  | 48.22717 | 16.36461 | 184.9 | male   | 61.5  | 130 | 116 |                                        |
| AD67 | Danube Canal | 2017 May 2  | 48.22558 | 16.36659 | 180.9 | male   | 94.2  | 158 | 151 |                                        |
| AD68 | Danube Canal | 2017 May 2  | 48.22596 | 16.36605 | 179.1 | male   | 296.5 | 223 | 200 | MRSE                                   |

|      |              |             |          |          |       |        |       |     |     |                          |                             |
|------|--------------|-------------|----------|----------|-------|--------|-------|-----|-----|--------------------------|-----------------------------|
| AD69 | Danube Canal | 2017 May 2  | 48.22646 | 16.36546 | 183.6 | female | 121.8 | 153 | 148 |                          | <i>S. fleurettii</i> (2)    |
| AD70 | Danube Canal | 2017 May 2  | 48.22637 | 16.36555 | 183.0 | male   | 120.4 | 157 | 142 |                          | <i>S. fleurettii</i> , MRSA |
| AD71 | Karlsplatz   | 2017 May 3  | 48.19881 | 16.37248 | 194.0 | male   | 210.9 | 214 | 176 |                          | <i>S. fleurettii</i>        |
| AD72 | Karlsplatz   | 2017 May 3  | 48.19876 | 16.37251 | 191.0 | male   | 90.3  | 160 | 136 | <i>E. xiangfangensis</i> | <i>S. fleurettii</i>        |
| AD73 | Danube Canal | 2017 May 23 | 48.22719 | 16.36445 | 187.7 | male   | 283.7 | 225 | 180 |                          |                             |
| AD74 | Karlsplatz   | 2017 Jun 6  | 48.19872 | 16.37246 | 175.8 | female | 55.6  | 132 | 126 | <i>E. coli</i>           | <i>S. fleurettii</i> , MRSH |
| AD75 | Karlsplatz   | 2017 Jun 6  | 48.19872 | 16.37246 | 175.8 | male   | 201.7 | 202 | 181 |                          |                             |
| AD76 | Karlsplatz   | 2017 Jun 6  | 48.19871 | 16.37235 | 176.1 | male   | 292.7 | 228 | 191 |                          | <i>S. fleurettii</i>        |

---
